# Supplementary material
Source: PubMed Central journal article supplement (PMC4011030)
Supplement: JCI67930sd.pdf [file JCI67930sd.pdf]

## SUPPLEMENTAL MATERIALS AND METHODS

### CCL-βAS3-FB LV vector construction

The *HBBAS3* cassette (human *HBB* gene with 3 amino acid substitutions, *HBB* promoter, 3' *HBB* enhancer, and DNAase hyper-sensitive sites HS2, HS3 and HS4) and the WPRE were amplified by PCR from the DL-βAS3 LV plasmid (1) (generously provided Tim Townes, UAB, Birmingham, AL) using AccuPrime Pfx DNA polymerase (Invitrogen, Carlsbad, CA) with the primers AS3-forward (F)-and AS3-reverse (R)-. The 6.6 Kb PCR product was purified by PureLink QuickGel Extraction Kit (Invitrogen, Carlsbad, CA) and subcloned into the plasmid pCR2.1-TOPO-TA (Invitrogen, Carlsbad, CA). To include the FB insulator in the 3'LTR of the pCCLcPPT-x- plasmid, a PCR reaction was done using pHR'-CMV-EGFP to generate a 1-LTR (SIN) plasmid, using the primers: pHR' 3'LTR-amp-ori F and pHR' 3'LTR-amp-ori R2. The 1-LTR plasmid was digested with EcoRV and PvuII, phosphatase treated and ligated with a phosphorylated oligonucleotide cassette containing the FB (77bp) insulator sequence (CCCAGGGATGTACGTCCCTAACCCGCTAGGGGGCAGCACCCAGGCCTGCACTGCCGCCT GCCGGCAGGGGTCCAGTC) (2) to obtain the 1-LTR-FB plasmid.

After verifying the 1-LTR-FB clone, PCR was performed with the 1-LTR-FB plasmid with primers 3'LTR F (58) and 3'LTR R (58); and then with the pCCL-cPPT empty backbone using the primers pCCL LTR insert F (60) and pCCL LTR insert R (59). These PCR products were used in an In-Fusion reaction (Clontech Laboratories, Inc, Mountain View CA). The two fragments overlapped at the 3'LTR, making the pCCL-cPPT-x-FB backbone. The pCCL-cPPT-x-cHS4 backbone was created by digesting the 1-LTR plasmid created from pHR', as described above, with EcoRV and PvuII. The 1.2kb cHS4 insulator was amplified using primers 1.2kb-F and 1.2kb-R. The resulting product was cloned into the linearized 1-LTR plasmid via In-Fusion (Clontech Laboratories, Inc, Mountain View CA). The full 3' LTR was transferred to pCCL-cPPT-x as described above for the FB-containing LTR. To include the βAS3-WPRE fragment into the

pCCL-cPPT-x- backbone, the PCR2.1 –TOPO- $\beta$ AS3-WPRE plasmid was digested with Scal and KpnI, the purified product was blunted and digested with XhoI. The 6.6kb band corresponding to the  $\beta$ AS3-WPRE fragment was isolated by gel purification and cloned into the pCCL-cPP-x- backbone, previously digested by EcoRV and XhoI. The resulting pCCL-cPPT- $\beta$ AS3-WPRE (called CCL- $\beta$ AS3) vector plasmid was fully sequenced to verify the construction. The same procedure was performed to develop the insulated versions CCL- $\beta$ AS3-FB and CCL- $\beta$ AS3-cHS4, cloning the  $\beta$ AS3-WPRE cassette in the previously described pCCL-cPPT-x-FB and pCCL-cPPT-x-cHS4 backbones, respectively. (Primers sequences are provided in **Supplemental Table 4**).

### **Production and titration of $\beta$ AS3-globin LV**

For small-scale production of LV for titer analysis, 293T cells ( $5 \times 10^6$ ) (ATCC, Manassas, VA) were seeded per 10 cm cell culture dishes coated with Poly L-Lysine (Sigma-Aldrich, St. Louis, MO) in 10 ml of D10 medium, consisting of DMEM (Mediatech, Herndon, VA) with 10% fetal bovine serum (FBS) (Gemini Bio-products, Sacramento, CA), 1X Glutamine, Penicillin and Streptomycin (Gemini Bio-Products, West Sacramento, CA), 24 hours before transfection. On the day of the transfection, 3 $\mu$ l of TransIT-293 (Mirus, Madison, WI) were used per 1  $\mu$ g of DNA. The TransIT volume needed for each condition was mixed with 500 $\mu$ l of OPTI-MEM (Invitrogen, Carlsbad, CA), vortexed and incubated for 20 minutes at room temperature. The OPTI-MEM/TransIT solution was mixed with (a) 5 $\mu$ g of the transfer plasmid, (b) 5 $\mu$ g of pMDL gag-pol/pRRE, (c) 2.5  $\mu$ g of pRSV-Rev (both were kind gifts of Luigi Naldini, CellGenesys, Foster City, CA), and (d) 1  $\mu$ g of pMDG-VSV-G (3). In the transfections that were done with TAT, 2.5 $\mu$ g of pSV2-tat were used (4) (provided by the NIH AIDS Research and Reagent Program, Germantown, MD). The DNA and OPTI-MEM/TransIT solutions were incubated for 15-30 minutes at room temperature. The 293T cells were washed with 10ml of D10 before adding the transfection mixture to each plate. Approximately 18-20 hours post-transfection, the medium on

the transfected cells was changed to medium containing 10 mM sodium butyrate (Sigma-Aldrich, St. Louis, MO) and 20 mM HEPES (Invitrogen, Carlsbad, CA). After 6-8 hours, the cells were washed with DPBS (Mediatech, Herndon, VA) and 6ml of medium containing 20 mM HEPES were added. After 48 hours, the vectors were harvested, filtered (0.45  $\mu$ m) and titered by qPCR as described previously (5). Large-scale viral preparations were produced and concentrated using tangential flow filtration and titered by qPCR as described previously (5).

### **FB insulator integrity in the CCL- $\beta$ AS3-FB provirus**

The integrity of the FB insulator was analyzed by PCR from both LTRs in transduced BM CD34+ cells at day 14 of in vitro erythroid culture after genomic DNA isolation using the PureLink Genomic DNA Mini Kit (Invitrogen, Carlsbad, CA). A first set of primers was designed (5'LTR-F and 5'LTR-R) to amplify the 5' LTR flanking the FB insertion site, with an expected band of 382 bp when the FB insulator was present and intact. The second set of primers was designed (3'LTR-F and 3'LTR-R) to amplify specifically the 3' LTR; in this case the predicted band was 249bp in the presence of the FB insulator. A third PCR reaction was performed combining the 5' LTR-F and the 3' LTR-R to amplify the FB insulator by itself from both LTRs. In this case the corresponding amplicon had a length of 135bp. (All primers sequence provided in **Supplemental Table 4**). PCR was executed using Taq DNA Polymerase, Native (Invitrogen, Carlsbad, CA) on an Eppendorf (Hamburg, Germany) thermocycler. PCR products were visualized by GelGreen on 2% agarose gels.

### **Southern Blot**

Southern blot analysis was performed to confirm the integrity of the CCL- $\beta$ AS3-FB LV provirus in the genome. 293T cells were transduced with the CCL- $\beta$ AS3-FB LV and expanded over two weeks, followed by genomic DNA isolation (Invitrogen, Carlsbad, CA). 10 $\mu$ g of genomic DNA was digested by Afl II (New England Biolabs, Ipswich, MA), electrophoresed at 20 volts

overnight in a 0.8% agarose gel, transferred to a nylon membrane and probed with a <sup>32</sup>P-labelled-WPRE fragment overnight.

### **Chromatin Immunoprecipitation (ChIP)**

K562 cells (ATCC # CCL-243™) were transduced with CCL-βAS3, CCL-βAS3-FB and CCL-βAS3-cHS4 LV vectors at a concentration of 2x10<sup>8</sup>TU/ml for each vector. 2x10<sup>7</sup> transduced K562 cells were collected, washed with PBS and cross-linked by incubation in 1% formaldehyde for 5 minute at room temperature. Nuclei were isolated using the truChIP Low Cell Chromatin Shearing Kit (Covaris, Woburn, MA), and the DNA-protein complexes were sheared for 6 minutes in a COVARIS M220 sonicator per manufacturer instructions. Sheared chromatin was immuno-precipitated (in triplicate) for 12-16h at 4°C using 5 µg of anti-CTCF antibody (Abcam, Cambridge, MA) or rabbit IgG as negative control (Invitrogen, Carlsbad, CA) following the “MAGnify Chromatin Immunoprecipitation System” protocol (Invitrogen, Carlsbad, CA). After reversing the cross-linking, DNA was quantified using “Quant-IT PicoGreen dsDNA Reagent and Kits” (Molecular Probes, Invitrogen, Carlsbad, CA). The same amounts of DNA from CTCF immuno-precipitated, IgG control and input DNA samples were used to perform real-time qPCR in triplicate using the Vii7 Applied Biosystems real time PCR machine with the following conditions: hold stage: 50°C for 2 minutes, 95°C for 10 minutes; PCR stage: 95°C for 15 seconds, 60°C for 1 minute (40 cycles). (Primers sequences are described in **Supplemental Table 4**).

Data were analyzed using relative quantitation method as described in the ABI User Bulletin #2 “Relative quantitation of gene expression” (6), and Litt *et al.* (7). In brief, fold enrichment for a particular target sequence was determined using the following formula: fold enrichment =  $AE^{(Ct_{input} - Ct_{IP})}$ . AE=amplification efficiency, input=amount of the target sequence in input DNA; IP=amount of target sequence in immune-precipitated DNA.

### **BM CD34<sup>+</sup> cell isolation**

Human CD34<sup>+</sup> cells were isolated from BM aspirates from HD and SCD donors (beta<sup>S</sup>/beta<sup>S</sup> or beta<sup>S</sup>/beta<sup>thal</sup><sup>0</sup>). The mononuclear fractions obtained by density gradient centrifugation on Ficoll-Hypaque (Amersham Pharmacia Biotech Piscataway, NJ) were processed using the Human CD34 Microbead kit (Miltenyi Biotech, Bergisch Gladbach, Germany) and the CD34<sup>+</sup> cells recovered were cryopreserved.

### **CFU progenitor assay in methylcellulose**

100, 300 and 1000 BM CD34<sup>+</sup> cells (non-transduced or transduced) were plated per 35 mm gridded cell culture dish in duplicate, using methylcellulose medium (Stem Cell Technologies, Vancouver, BC, Canada) enriched to support optimal growth of human hematopoietic progenitors from CD34<sup>+</sup>-enriched cells. After 14 days of culture at 5% CO<sub>2</sub>, 37°C and humidified atmosphere, the different types of colonies were identified based in their morphology, and then counted and plucked for genomic DNA isolation (NucleoSpin Tissue XS, Clontech, Mountain View, CA) for determination of VC/cell by qPCR as described before (5).

### **Myeloid Culture**

In parallel to the erythroid culture 5x10<sup>4</sup> cells per condition were grown in myeloid conditions for 14 days to measure VC/cell by qPCR as described before (5). The basic myeloid medium consists of IMDM supplemented with 20% of FBS (Life Technologies, Grand Island, NY), 35% BSA (Sigma-Aldrich, St. Louis, MO), 1X Glutamine, Penicillin and Streptomycin, 5 ng/ml hIL-3, 10 ng/ml hIL-6 (both from R&D) and 25 ng/ml hSCF (StemGent, Cambridge, MA).

### **Flow cytometry during erythroid culture**

At days 3, 14 and 21 of the in vitro erythroid differentiation, 2x10<sup>5</sup> cells were collected for flow cytometry analysis. The samples were stained with the following antibodies: phycoerythrin (PE)-

conjugated anti-human CD34, V450-conjugated anti-human CD45, allophycocyanin (APC)-conjugated anti-human CD71 (all from BD Biosciences, San Jose, CA) and fluorescein isothiocyanate (FITC)-conjugated anti-GlycophorinA (GpA) (Santa Cruz Biotechnologies, Santa Cruz, CA). At day 21, the percentage of enucleated RBC produced was measured by double staining: DRAQ5 (Biostatus Limited, UK) for nuclear staining and FITC-conjugated anti-GpA; enucleated RBC were defined as being GpA<sup>+</sup>/DRAQ5<sup>-</sup>. All the flow cytometry analyses were performed on an LSR Fortessa cell analyzer (BD Biosciences, San Jose, CA).

### **In vitro immortalization (IVIM) assay**

To obtain lineage-negative (stem cell enriched) populations from BM, untreated 7- to 12-week-old male B6.SJL-Ptprc<sup>a</sup>Pepc<sup>b</sup>/BoyJ (“Pep Boys”) were used as donors. BM cells were collected from the long bones (2 femurs, 2 tibias and 2 humeri) of each mouse into IMDM supplemented with 10% FBS. Lineage-negative cells were isolated from single cell suspensions of whole BM cells by using the Lineage Cell Depletion Kit (Miltenyi Biotec, Bergisch Gladbach, Germany) according to manufacturer's instructions and cryopreserved in aliquots.

Upon thawing, lineage-negative cells were pre-stimulated in StemSpan SFEM serum-free expansion medium (STEMCELL Technologies Inc., Vancouver, Canada) containing 50ng/ml mSCF, 100ng/ml human Interleukin-11(hIL-11), 20ng/ml mIL-3 (all PeproTech Inc., Rocky Hill, NJ, USA), 100ng/ml hFlt3-L (Celldex Therapeutics, Needham, MA) and 1X Glutamine, Penicillin and Streptomycin in Retronectin (20 $\mu$ g/ml) coated wells of 24 well plates at a concentration of 0.5-1x10<sup>6</sup> cells/ml for 2 days before exposure to vector particles.

For retroviral transduction, RSF91-GFP-WPRE viral particles were preloaded onto Retronectin coated wells of 24 well plates by centrifugation at 1000g for 30 minutes at 4°C at multiplicity of infection ranging from 1 to 20. The viral supernatant was aspirated, and 1x10<sup>5</sup> pre-stimulated lineage negative cells were added in 500 $\mu$ L StemSpan medium containing cytokines

on day 3. On day 4, cells were transferred to a new 24 well plate, freshly preloaded with retroviral particles in 1mL to account for increasing cell numbers. For LV transduction,  $1 \times 10^5$  pre-stimulated lineage-negative cells were transduced with concentrated CCL- $\beta$ AS3, CCL- $\beta$ AS3-FB and CCL- $\beta$ AS3- cHS4 LV supernatants at  $2 \times 10^7$  TU/mL and  $2 \times 10^8$  TU/ml in 500 $\mu$ L StemSpan medium containing cytokines on day 3. On day 4, 500 $\mu$ L medium was added to account for increasing cell numbers.

Starting on day 5 (day 1 pTD), mock-, retroviral- and lentiviral-transduced samples were expanded as mass cultures for 2 weeks in IMDM supplemented with 10% FBS, 1X Glutamine, Penicillin and Streptomycin, 50ng/ml mSCF, 100ng/ml hIL-11, 20ng/ml mL-3 and 100ng/ml hFlt3-L. During this time, cell density was adjusted to  $5 \times 10^5$ /ml on days 4, 6, 8, 11, and 13 pTD. On day 15 pTD, cells were plated in a limiting dilution assay in 96 well plates at a density of 100 cells/well and 1000 cells/well, respectively, in 100 $\mu$ l IMDM supplemented with FBS, Glutamine, Penicillin, Streptomycin and cytokines. Two weeks later the positive wells were counted, and the frequency of replating cells was calculated based on Poisson statistics using L-Calc Software (STEMCELL Technologies Inc., Vancouver, Canada).

### ***HBBAS3* mRNA expression in erythroid and myeloid conditions**

After BM-CD34+ cells transduction, samples were divided into parallel cultures under myeloid and erythroid differentiation conditions. At 14 day of culture,  $1.5 \times 10^5$  cells were harvested for each group. RNA extraction and cDNA synthesis were performed as described in the Materials and Methods section. The ddHBBAS3 assay sequences are provided in **Supplemental Table 4**. The  $\beta$ -Actin, ACTB (Hs 99999903\_m1), was purchased as a 20x-premix of primers and FAM-MGBNFQ probe (Applied Biosystems, San Francisco, California). Reaction mixtures of 20  $\mu$ l volume comprising 1x ddPCR Master Mix (Bio-Rad, Hercules, California), relevant primers and probe (900nM and 250nM for ACTB primers and probe respectively; 500nM and 100nM for

ddHBB<sup>AS3</sup> primers and probe), and 1 ul of cDNA were prepared. Droplet generation was performed as described in Hindson *et al.*, (8). The droplet emulsion was then transferred with a multichannel pipet to a 96-well propylene plate (Eppendorf, Hamburg, Germany), heat sealed with foil, and amplified in a conventional thermal cycler (T100 Thermal Cycler, Bio-Rad). Thermal cycling conditions consisted of 95°C 10 min, 94°C 30 s and 60°C 1 min (55 cycles), 98°C 10 min (1 cycle), and 12°C hold. After PCR, the 96-well plate was transferred to a droplet reader (Bio-Rad). Acquisition and analysis of the ddPCR data was performed with the QuantaSoft software (Bio-Rad), provided with the droplet reader. The relative expression of *HBBAS3/ACTB* was calculated by dividing the concentration (copies/ul) of *HBBAS3* by the concentration of *ACTB*, and normalized to the VC/cell.



**Supplemental Table 1:** Measurement of %HbAS3 by HPLC and IEF

|             |    | %HbAS3 or HbA |       | %HbS   |        | %HbAS3/VC |       | VC/cell |
|-------------|----|---------------|-------|--------|--------|-----------|-------|---------|
|             |    | *HPLC         | IEF   | *HPLC  | IEF    | *HPLC     | IEF   |         |
| SCD Mock    | #1 | 0.00          | 0.00  | 100.00 | 100.00 | NA        | NA    | NA      |
| SCD-βAS3-FB | #1 | 24.40         | 26.70 | 75.60  | 73.30  | 24.65     | 26.97 | 0.99    |
| SCD Mock    | #2 | 8.10          | 0.00  | 91.90  | 100.00 | NA        | NA    | NA      |
| SCD-βAS3-FB | #2 | 15.20         | 9.50  | 84.40  | 90.50  | 15.78     | 21.11 | 0.45    |

NA: Not Applicable

\*For this comparison, we only considered the HbA, HbAS3, and the HbS peaks. The percentage of HbAS3 was defined as %HbAS3 / (%HbA+%HbAS3+%HbS). In the case where there was expression of HbA in the mock-transduced control, this value was subtracted before normalizing to VC.

HPLC was performed by the UCLA Clinical Laboratory and Pathology Services using the Bio-Rad CDM 5.1 VII instrument.

**Supplemental Table 2: IVIM assay results**

| Vector         | Exp. No. | Titer [TU/mL]       | MOI  | VC d.8 | No. of pos. wells (10 <sup>2</sup> cells/well) | No. of pos. wells (10 <sup>3</sup> cells/well) | Replating frequency | Replating frequency/VC |
|----------------|----------|---------------------|------|--------|------------------------------------------------|------------------------------------------------|---------------------|------------------------|
| Non-transduced | 1        | -                   | -    | -      | 0                                              | 0                                              | -                   | -                      |
|                | 2        | -                   | -    | -      | 0                                              | 0                                              | -                   | -                      |
|                | 3        | -                   | -    | -      | 0                                              | 0                                              | -                   | -                      |
|                | 4        | -                   | -    | -      | 0                                              | 0                                              | -                   | -                      |
|                | 4        | -                   | -    | -      | 0                                              | 0                                              | -                   | -                      |
| RSF91-GFP      | 1        | 1.9x10 <sup>6</sup> | 1    | 1.26   | 9                                              | 47                                             | 7.10E-04            | 5.63E-04               |
|                | 1        |                     | 20   | 12.83  | 0                                              | 0                                              | -                   | -                      |
|                | 2        |                     | 5    | 6.09   | 0                                              | 2                                              | 1.91E-05            | 3.14E-06               |
|                | 2        |                     | 8    | 9.78   | 81                                             | 96                                             | 1.86E-02            | 1.90E-03               |
|                | 3        |                     | 8    | 7.90   | 33                                             | 94                                             | 4.04E-03            | 5.12E-04               |
|                | 3        |                     | 8    | 5.02   | 0                                              | 0                                              | -                   | -                      |
|                | 4        |                     | 8    | 4.65   | 96                                             | 96                                             | >4.56E-02           | >9.81E-03              |
|                | 4        |                     | 8    | 4.92   | 0                                              | 0                                              | -                   | -                      |
|                | 4        |                     | 8    | 6.94   | 0                                              | 0                                              | -                   | -                      |
|                | 4        |                     | 8    | 7.10   | 17                                             | 87                                             | 2.26E-03            | 3.18E-04               |
|                | 4        |                     | 14   | 8.24   | 91                                             | 96                                             | 2.95E-02            | 3.59E-03               |
|                | 4        |                     | 14   | 8.35   | 96, 96                                         | 96                                             | >5.26E-02           | >6.0E-03               |
| CCL-βAS3       | 1        | 1.5x10 <sup>9</sup> | 1000 | 1.02   | 0                                              | 0                                              | -                   | -                      |
|                | 2        |                     | 100  | 1.10   | 0                                              | 0                                              | -                   | -                      |
|                | 3        | 5.0x10 <sup>9</sup> | 100  | 2.32   | 0                                              | 0                                              | -                   | -                      |
|                | 3        |                     | 100  | 3.39   | 0                                              | 0                                              | -                   | -                      |
| CCL-βAS3-FB    | 1        | 6.0x10 <sup>8</sup> | 1000 | 4.68   | 0                                              | 0                                              | -                   | -                      |
|                | 1        |                     | 100  | 4.76   | 0                                              | 0                                              | -                   | -                      |
|                | 2        |                     | 100  | 4.32   | 0                                              | 0                                              | -                   | -                      |
|                | 2        |                     | 100  | 4.52   | 0                                              | 0                                              | -                   | -                      |
|                | 3        | 6.0x10 <sup>8</sup> | 100  | 3.66   | 0                                              | 0                                              | -                   | -                      |
|                | 3        |                     | 100  | 3.31   | 0                                              | 0                                              | -                   | -                      |
|                | 4        |                     | 100  | 3.22   | 0                                              | 0                                              | -                   | -                      |
|                | 4        |                     | 100  | 3.56   | 0                                              | 0                                              | -                   | -                      |
|                | 4        |                     | 100  | 3.23   | 0                                              | 0                                              | -                   | -                      |
|                | 4        |                     | 100  | 4.23   | 0                                              | 0                                              | -                   | -                      |
|                | 4        |                     | 100  | 4.55   | 0                                              | 0                                              | -                   | -                      |
|                | 4        |                     | 100  | 3.49   | 0                                              | 0                                              | -                   | -                      |
|                | 4        |                     | 100  | 3.49   | 0                                              | 0                                              | -                   | -                      |
|                | 4        |                     | 100  | 2.56   | 0                                              | 0                                              | -                   | -                      |
| CCL-βAS3-cHS4  | 2        | 1.6x10 <sup>8</sup> | 100  | 0.30   | 0                                              | 0                                              | -                   | -                      |
|                | 3        |                     | 100  | 0.54   | 0                                              | 0                                              | -                   | -                      |
|                | 3        |                     | 100  | 0.36   | 0                                              | 0                                              | -                   | -                      |
|                | 3        |                     | 100  | 0.41   | 0                                              | 0                                              | -                   | -                      |

**Supplemental Table 3: CCL-βAS3-FB most frequent integration sites and the genes involved**

| Chromosome | Orientation | Nucleotide Position | Genes containing IS or with IS <50kb from TSS                                                                         |
|------------|-------------|---------------------|-----------------------------------------------------------------------------------------------------------------------|
| chr4       | +           | 91503107            | FAM190A                                                                                                               |
| chr16      | +           | 1448144             | UNKL, C16orf42, GNPTG, C16orf91, CCDC154                                                                              |
| chr17      | -           | 76027400            | TNRC6C                                                                                                                |
| chr19      | +           | 5631833             | SAFB, SAFB2, C19orf70, HSD11B1L                                                                                       |
| chr9       | +           | 140097278           | LRRC26, MIR3621, ANAPC2, SSNA1, TPRN, TMEM203, NDOR1, RNF208, C9orf169, LOC643596, SLC34A3, TUBB2C, FAM166A, C9orf173 |
| chr22      | +           | 24782983            | SPECC1L, ADORA2A                                                                                                      |
| chr11      | -           | 73279161            | FAM168A                                                                                                               |
| chr6       | +           | 34599566            | C6orf106                                                                                                              |
| chr16      | -           | 20839013            | LOC81691, ERI2                                                                                                        |
| chr13      | +           | 28784427            | PAN3                                                                                                                  |
| chr17      | +           | 29584884            | NF1, OMG                                                                                                              |
| chr22      | +           | 50820904            | PPP6R2                                                                                                                |
| chr22      | +           | 38064948            | TRIOBP, SH3BP1, PDXP, LGALS1, NOL12                                                                                   |
| chr12      | -           | 62238951            | FAM19A2                                                                                                               |
| chr17      | +           | 7158187             | DLG4, ACADVL, MIR324, DVL2, PHF23, GABARAP, CTDNEP1, C17orf81, CLDN7, SLC2A4, YBX2                                    |
| chr12      | +           | 96696545            | CDK17                                                                                                                 |
| chr5       | +           | 88144268            | MEF2C                                                                                                                 |
| chr22      | +           | 38784207            | LOC400927                                                                                                             |
| chrX       | -           | 153651194           | FLNA, EMD, RPL10, SNORA70, DNASE1L1, TAZ, ATP6AP1, GDI1, FAM50A, PLXNA3                                               |
| chr3       | +           | 49120118            | USP19, QRICH1, QARS                                                                                                   |
| chr19      | -           | 6843325             | VAV1, EMR1                                                                                                            |
| chr4       | -           | 7509127             | SORCS2, MIR4274                                                                                                       |
| chr5       | -           | 77481360            | AP3B1                                                                                                                 |
| chr16      | -           | 1437062             | UNKL, C16orf42, GNPTG, C16orf91                                                                                       |
| chr10      | +           | 70679777            | DDX50, DDX21                                                                                                          |
| chr8       | -           | 125342013           | TMEM65                                                                                                                |
| chr15      | -           | 75352474            | PPCDC                                                                                                                 |
| chr11      | -           | 96043251            | MAML2, MIR1260B                                                                                                       |
| chr19      | -           | 12287594            | ZNF20, ZNF625-ZNF20, ZNF625, ZNF136                                                                                   |
| chr4       | +           | 28371               | ZNF718, ZNF595                                                                                                        |
| chr9       | +           | 75760126            | ANXA1                                                                                                                 |
| chr1       | +           | 31467152            | PUM1, SNORD103A, SNORD103B, SNORD85, PRO0611                                                                          |
| chr19      | +           | 54072589            | ZNF331, LOC284379                                                                                                     |
| chr2       | +           | 43510437            | THADA                                                                                                                 |
| chr9       | -           | 140547986           | ARRDC1, EHMT1, C9orf37                                                                                                |

|       |   |           |                                                                                 |
|-------|---|-----------|---------------------------------------------------------------------------------|
| chr16 | + | 22473380  | RRN3P3, LOC641298                                                               |
| chr17 | + | 4862964   | PFN1, GP1BA, SLC25A11, RNF167, ENO3, SPAG7, CAMTA2, INCA1, KIF1C                |
| chr12 | + | 41740589  | PDZRN4                                                                          |
| chr1  | - | 153864313 | GATAD2B                                                                         |
| chr12 | + | 1365953   | ERC1                                                                            |
| chr6  | + | 47720503  | OPN5                                                                            |
| chr17 | + | 48801784  | ANKRD40, LUC7L3, C17orf73                                                       |
| chr9  | + | 131396459 | WDR34, SET                                                                      |
| chr16 | - | 30309972  | LOC440354, LOC595101                                                            |
| chr13 | - | 30846878  | KATNAL1                                                                         |
| chr17 | - | 80485547  | FOXK2                                                                           |
| chr9  | + | 139618741 | AGPAT2, FAM69B, SNHG7, SNORA43, SNORA17, LCN10, LCN6, LOC100128593, LCN8, LCN15 |
| chr12 | - | 12367074  | LRP6                                                                            |
| chr4  | - | 151274215 | LRBA                                                                            |
| chr11 | + | 87034027  | TMEM135                                                                         |
| chr6  | + | 149696229 | TAB2, SUMO4                                                                     |
| chr1  | - | 150116016 | VPS45, PLEKHO1                                                                  |
| chr19 | + | 41886689  | TGFB1, B9D2, TMEM91, EXOSC5, BCKDHA, B3GNT8                                     |
| chr9  | + | 128680454 | PBX3                                                                            |
| chr19 | + | 51761097  | CD33, C19orf75                                                                  |
| chr1  | - | 205577716 | MFSD4, ELK4                                                                     |
| chr15 | - | 86147491  | AKAP13                                                                          |
| chrX  | - | 67562531  | OPHN1                                                                           |
| chr17 | + | 6497265   | PITPNM3, KIAA0753, TXNDC17                                                      |
| chr5  | + | 179180503 | MAML1, LTC4S, MGAT4B, MIR1229                                                   |
| chr17 | - | 7066197   | ASGR1, ASGR2                                                                    |
| chr1  | - | 87554536  | HS2ST1, LOC339524                                                               |
| chr17 | - | 79551397  | NPLOC4, C17orf70                                                                |
| chr11 | - | 64538262  | NRXN2, RASGRP2, PYGM, SF1, MAP4K2, MEN1                                         |
| chr19 | + | 19357037  | NR2C2AP, NCAN, HAPLN4, TM6SF2                                                   |
| chr8  | - | 125359290 | TMEM65                                                                          |
| chr1  | + | 155705973 | YY1AP1, DAP3, MSTO2P                                                            |
| chr11 | + | 65939541  | PACS1                                                                           |
| chr17 | - | 79946163  | ASPSCR1, MYADML2, NOTUM, STRA13, LRRC45, RAC3, DCXR                             |
| chr16 | + | 89733855  | LOC100128881, DPEP1, CHMP1A, C16orf55, CDK10, SPATA2L                           |
| chr17 | - | 79946910  | ASPSCR1, MYADML2, NOTUM, STRA13, LRRC45, RAC3, DCXR                             |
| chr7  | + | 71448707  | CALN1                                                                           |
| chr17 | - | 60792253  | MARCH10, MIR548W                                                                |

|       |   |           |                                                                                                                                            |
|-------|---|-----------|--------------------------------------------------------------------------------------------------------------------------------------------|
| chr14 | + | 23279541  | OXA1L, SLC7A7, MRPL52, MMP14                                                                                                               |
| chr5  | - | 80777267  | SSBP2                                                                                                                                      |
| chr19 | + | 19355711  | NR2C2AP, NCAN, HAPLN4, TM6SF2                                                                                                              |
| chr17 | - | 80721443  | TBCD, FN3KRP, FN3K                                                                                                                         |
| chr10 | - | 104904280 | NT5C2                                                                                                                                      |
| chr17 | + | 43292854  | FMNL1, LOC100133991, C17orf46                                                                                                              |
| chr16 | + | 28826388  | ATXN2L, TUFM, SH2B1                                                                                                                        |
| chr9  | - | 134282246 | PRRC2B                                                                                                                                     |
| chr2  | + | 28448731  | BRE                                                                                                                                        |
| chr19 | + | 10724641  | SLC44A2, KRI1, CDKN2D, AP1M2, LOC147727, ILF3                                                                                              |
| chr2  | + | 38527752  | ATL2                                                                                                                                       |
| chr1  | - | 228375017 | OBSCN, GUK1, GJC2, IBA57                                                                                                                   |
| chr11 | - | 65908400  | PACS1                                                                                                                                      |
| chr6  | - | 4033876   | PRPF4B, C6orf201, C6orf146                                                                                                                 |
| chr17 | + | 78797539  | RPTOR                                                                                                                                      |
| chr17 | + | 7128036   | ASGR1, DLG4, ACADVL, MIR324, DVL2, PHF23, GABARAP, CTDNEP1, C17orf81, CLDN7                                                                |
| chr15 | - | 86198240  | AKAP13                                                                                                                                     |
| chr11 | - | 66924001  | KDM2A                                                                                                                                      |
| chr12 | + | 123810408 | SBNO1                                                                                                                                      |
| chr1  | + | 150643770 | ENSA, GOLPH3L, HORMAD1                                                                                                                     |
| chr8  | + | 90965062  | NBN, DECR1                                                                                                                                 |
| chr4  | - | 215542    | ZNF876P                                                                                                                                    |
| chr6  | - | 34627686  | C6orf106                                                                                                                                   |
| chr12 | - | 2975517   | TULP3, NRIP2, FOXM1, C12orf32                                                                                                              |
| chr19 | - | 42067550  | CEACAM21                                                                                                                                   |
| chr13 | + | 96512078  | UGGT2                                                                                                                                      |
| chr17 | - | 75129947  | SEC14L1, C17orf86, SCARNA16                                                                                                                |
| chr7  | - | 99030455  | PDAP1, BUD31, PTCD1, ATP5J2-PTCD1, CPSF4, ATP5J2, ZNF789                                                                                   |
| chr17 | - | 3974136   | ZZEF1                                                                                                                                      |
| chr6  | - | 2881463   | SERPINB1, MGC39372, SERPINB9                                                                                                               |
| chr2  | - | 58890146  | FLJ30838                                                                                                                                   |
| chr11 | + | 62577565  | SLC3A2, POLR2G, TAF6L, TMEM179B, TMEM223, NXF1, STX5, WDR74, SNHG1, SNORD22, SNORD31, SNORD30, SNORD29, SNORD28, SNORD27, SNORD26, SNORD25 |
| chrX  | - | 135236461 | FHL1                                                                                                                                       |
| chr17 | - | 15451767  | FAM18B2-CDRT4, FAM18B2                                                                                                                     |

**Supplemental Table 4: Oligonucleotides sequences**

| <b>Primers Name</b>                  | <b>Sequence (5'-3')</b>           |
|--------------------------------------|-----------------------------------|
| AS3-F                                | CTACTAGTGGAGATCCC                 |
| AS3-R                                | GAAGCTTGAGCGAATTC                 |
| PHR' 3'LTR-amp-ori F                 | GGGACTGGAAGGGCTAATTCCTC           |
| PHR' 3'LTR-amp-ori R2                | CCAGCAAAAGGCCAGGAACC              |
| 3'LTR F (58)                         | GGGACTGGAAGGGCTAATTC              |
| 3'LTR R (58)                         | CCTCTCACTCTCTGATATTCATTTCTT       |
| pCCL LTR insert F (60)               | AGCCCTTCCAGTCCCCC                 |
| pCCL LTR insert R (59)               | TCAGAGAGTGAGAGGAACTTGTTTATT       |
| 5'LTR-F                              | GGCTAATTCACTCCCAACGAAGACAAG       |
| 5'LTR-R                              | CTT CAG CAA GCC GAG TCC TGC       |
| 3'LTR-F                              | ACC TCG AGA CCT AGA AAA ACA TGG C |
| 3'LTR-R                              | CAGAGAGACCCAGTACAAGCAAAAAG        |
| HBB <sup>AS3</sup> F                 | TGTGGGACAAGGTGAACGTGGATGCC        |
| HBB <sup>AS3</sup> R                 | CAAGGGTAGACCACCAGCAGCCTG          |
| HBB <sup>A</sup> /HBB <sup>S</sup> F | TGTGGGGCAAGGTGAACGTGGATGAA        |
| HBB <sup>A</sup> /HBB <sup>S</sup> R | CAAGGGTAGACCACCAGCAGCCTG          |
| FB-F                                 | ACTCCCAACGAAGACAAGATCCCA          |
| FB-R                                 | ACCAGAGAGACCCAGTACAAGCAA          |
| cHS4-F                               | GTAATTACGTCCCTCCCCCG              |
| cHS4-R                               | AAGCGTTCAGAGGAAAGCGA              |
| U3-F                                 | ACTCCCAACGAAGACAAGATCTGC          |
| U3-R                                 | ATTGAGGCTTAAGCAGTGGGTTC           |
| H19-F                                | AGAATCGGCTGTACGTGTGG              |

|                            |                                          |
|----------------------------|------------------------------------------|
| H19-R                      | GGGACGTTTCTGTGGGTGAA                     |
| Myc-F                      | GCCATTACCGGTTCTCCATA                     |
| Myc-R                      | CAGGCGGTTCTTAAAACAA                      |
| ddHBB <sup>AS3</sup> -F    | GGAGAAGTCTGCCGTTACTG                     |
| ddHBB <sup>AS3</sup> -R    | CACTAAAGGCACCGAGCACT                     |
| ddHBB <sup>AS3</sup> Probe | FAM-ACAAGGTGA-ZEN-ACGTGGATGCCGTTG-31ABFQ |

---

**Supplemental Figure 1.**  $\beta$ AS3 LVs plasmid maps and production in the presence or absence of TAT protein

**A**

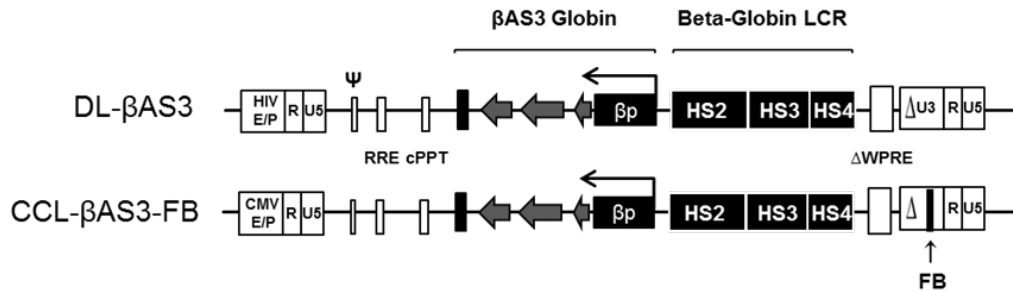

**B**

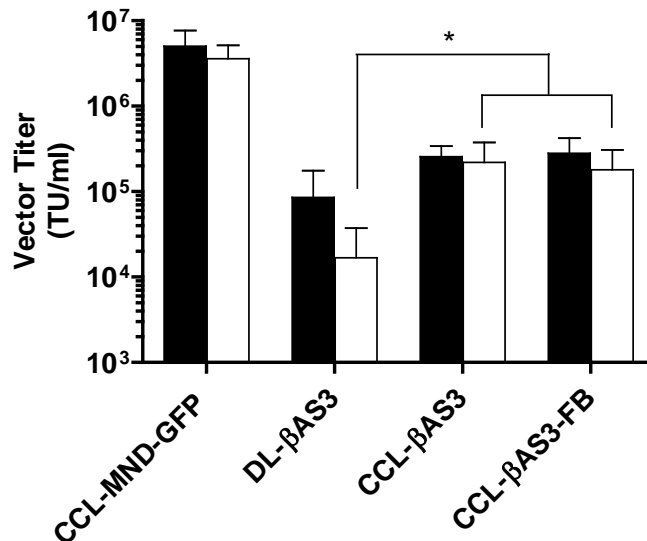

(A) Vector plasmid forms of the parental DL- $\beta$ AS3 (top) in which transcription driven by the HIV-1 enhancer and promoter is dependent upon TAT and the CCL- $\beta$ AS3-FB (bottom) in which the CMV enhancer/promoter is substituted in the 5' LTR, eliminating the need for TAT. In both cases, the HIV-1 packaging sequence ( $\Psi$ ), rev responsive element (RRE), central polypurine tract (cPPT), and the Woodchuck Hepatitis Virus post-transcriptional regulatory element (WPRE) are shown. (B) The DL- $\beta$ AS3, CCL- $\beta$ AS3, CCL- $\beta$ AS3-FB and the positive control CCL-MND-GFP LV vectors were packaged in the presence (black bars) or absence (white bars) of an HIV-1 TAT expression plasmid. Averages of three experiments and SD are shown.



**Supplemental Figure 2.** Integrity of the  $\beta$ AS3-FB provirus

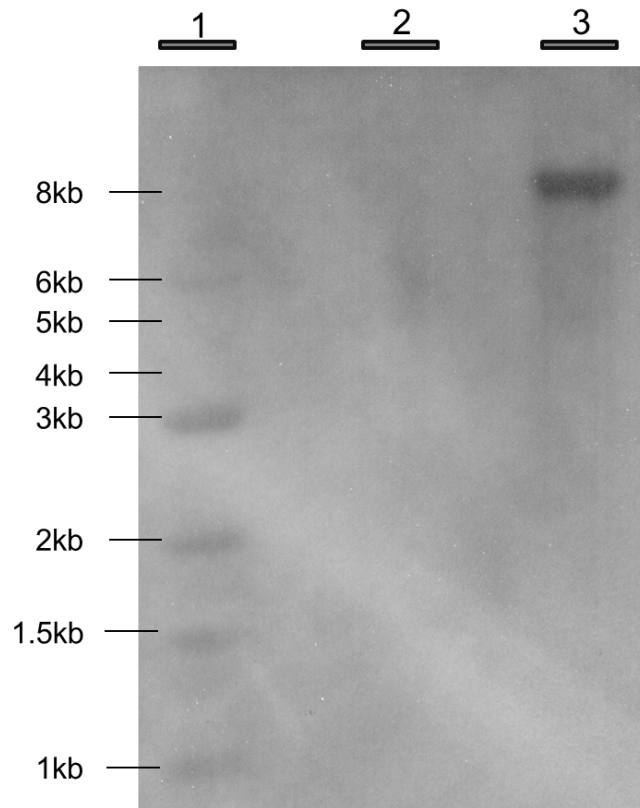

Southern Blot analysis was performed to confirm full length integrity of the provirus. Genomic DNA of 293T cells, mock-transduced or transduced with the CCL- $\beta$ AS3-FB LV (with an average VC/cell of 10 analyzed by qPCR) was digested by AflIII, which cuts in each LTR of the provirus and should release a nearly full-length genome fragment (8.6 Kb). The DNA ladder is shown in the lane 1, followed by the mock-transduced cells in lane 2 and the CCL- $\beta$ AS3-FB-transduced cells in the lane 3, where a unique band representing the intact provirus of the right size is present.

**Supplemental Figure 3.** Erythroid specific expression of the *HBBAS3* cassette

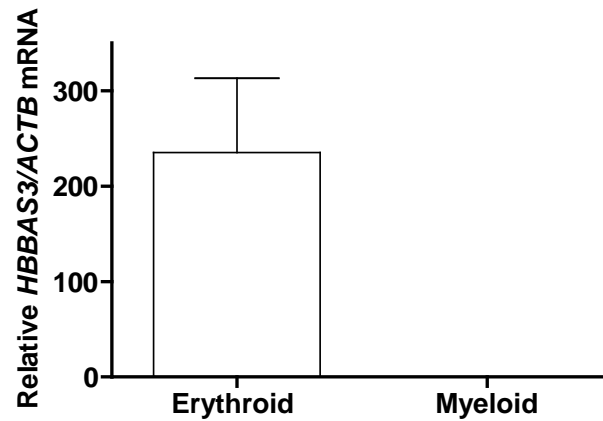

*HBBAS3* mRNA expression at day 14 of erythroid or myeloid cultures was analyzed relative to the endogenous control gene *ACTB*. In three separate experiments, no mRNA expression by the *HBBAS3* transgene was detected in myeloid conditions ( $0.04 \pm 0.01$ ) relative expression compared to *ACTB*. In contrast, the same cells grown under erythroid conditions, showed high expression of *HBBAS3* mRNA ( $235.35 \pm 77.77$ ). The mRNA expression in each condition was normalized to the VC/cell obtained from the erythroid and myeloid samples, respectively. Values shown are average  $\pm$  SD.

**Supplemental Figure 4.** Expression of the *HBAS3* transgene in the presence or absence of the FB insulator

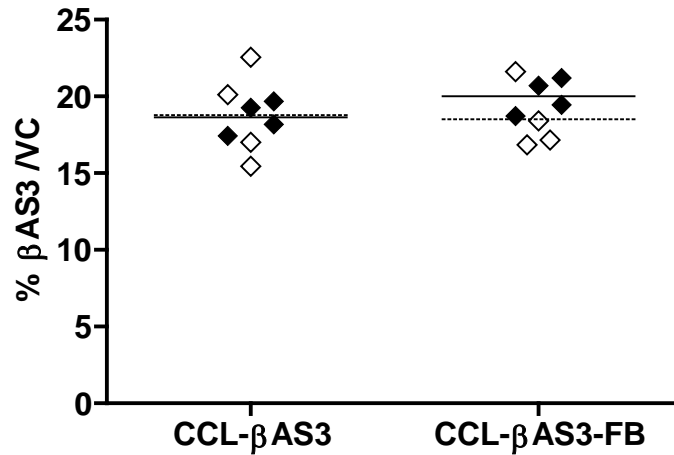

Expression of the *HBAS3* cassette from erythroid cells produced by BM-CD34+ cells from SCD donors, transduced with the CCL- $\beta$ AS3 or the CCL- $\beta$ AS3-FB LV, was analyzed by RT-qPCR to determine the percentage of *HBAS3* mRNA per VC/cell (solid rhombus); or by IEF to determine the percentage of HbAS3 protein per VC/cell (empty rhombus). No differences were found in the percentage of *HBAS3* mRNA of the total beta-globin-like mRNA ( $p=0.12$ , two-tailed t-test); or in the percentage of HbAS3 of the total Hb ( $p=0.89$ , two-tailed t-test) in erythroid cells transduced with the CCL- $\beta$ AS3 or the CCL- $\beta$ AS3-FB LV. Therefore, these results indicate that the FB insulator did not provide barrier activity to improve position-independent expression; since the addition of the FB insulator did not alter the expression of the *HBAS3* cassette when compared to the non-insulated LV. Error bars represent mean values.

**Supplemental Figure 5.** VC/cell analysis in different assay conditions

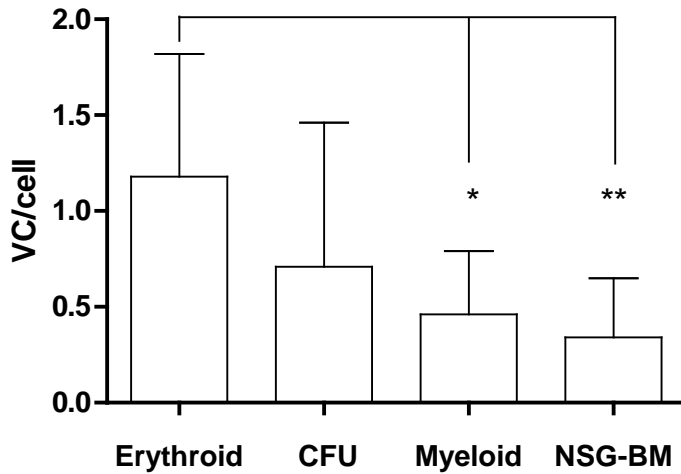

VC/cell was determined by qPCR in CCL- $\beta$ AS3-FB-transduced BM CD34+ cells grown in erythroid conditions, methylcellulose medium (CFU), myeloid conditions and expanded from engrafted NSG BM. VC/cell measurements from cells grown in erythroid culture assay were significantly higher than those measured in cells grown in myeloid culture (\* $p=0.0003$ ) or from NSG BM (\*\* $p<0.0001$ ). Values shown are average  $\pm$  SD.

## REFERENCES

1. Levasseur DN, Ryan TM, Pawlik KM, Townes TM. Correction of a mouse model of sickle cell disease: lentiviral/antisickling beta-globin gene transduction of unmobilized, purified hematopoietic stem cells. *Blood*. 2003;102(13):4312–4319.
2. Ramezani A, Hawley TS, Hawley RG. Combinatorial incorporation of enhancer-blocking components of the chicken beta-globin 5'HS4 and human T-cell receptor alpha/delta BEAD-1 insulators in self-inactivating retroviral vectors reduces their genotoxic potential. *Stem Cells*. 2008;26(12):3257–3266.

3. Naldini L, Blömer U, Gallay P et al. In vivo gene delivery and stable transduction of nondividing cells by a lentiviral vector. *Science*. 1996;272(5259):263–267.
4. Frankel AD, Pabo CO. Cellular uptake of the tat protein from human immunodeficiency virus. *Cell*. 1988;55(6):1189–1193.
5. Cooper AR, Patel S, Senadheera S, Plath K, Kohn DB, Hollis RP. Highly efficient large-scale lentiviral vector concentration by tandem tangential flow filtration. *J Virol Methods*. 2011;177(1):1–9.
6. Biosystems A. ABI PRISM 7700 Sequence Detection System. *ABI PRISM 7700 Sequence Detection System*. 2001;(User Bulletin #2):1–36.
7. Litt MD, Simpson M, Recillas-Targa F, Prioleau MN, Felsenfeld G. Transitions in histone acetylation reveal boundaries of three separately regulated neighboring loci. *EMBO J*. 2001;20(9):2224–2235.
8. Hindson BJ, Ness KD, Masquelier DA et al. High-throughput droplet digital PCR system for absolute quantitation of DNA copy number. *Anal Chem*. 2011;83(22):8604-10.
